# Supplementary material for: Polystyrene nanoplastics foster Escherichia coli O157:H7 growth and antibiotic resistance with a stimulating effect on metabolism
Source: Royal Society of Chemistry journal article supplement (doi:10.1039/d2en00982j), 2023-01-01
Supplement: d2en00982j1.pdf [file d2en00982j1.pdf]

## **Electronic Supplementary Information**

### **Polystyrene nanoplastics foster *Escherichia coli* O157:H7 growth and antibiotic resistance with a stimulating effect on metabolism**

Shuting Fang <sup>a</sup>, Yiquan Huang <sup>a</sup>, Zhangmin Xiang <sup>a</sup>, Rong Zeng <sup>b</sup>, Shulin Zeng <sup>b</sup>,  
Shuqin Liu <sup>a\*</sup>

<sup>a</sup> *Guangdong Provincial Key Laboratory of Chemical Measurement and Emergency Test Technology, Guangdong Provincial Engineering Research Center for Ambient Mass Spectrometry, Institute of Analysis, Guangdong Academy of Sciences (China National Analytical Center, Guangzhou), Guangzhou 510070, China*

<sup>b</sup> *School of Food Science and Engineering, Foshan University, Foshan 528231, China*

**\* Corresponding author:**

E-mail: liu.shuqin@foxmail.com

Tel./fax: +86 020 3165 1710

## Text S1

**Headspace SPME methodology.** Based on our previous studies [1-2], a novel hydrophobic-hydrophilic balanced SPME probe was used to realize the high-coverage capture to in vivo volatile metabolites in this work. Before each extraction, the SPME probe was conditioned at 250 °C in the GC injection port under nitrogenous atmosphere in order to avoid any contamination or carryover. The bacterial suspension (1 mL) of *E. coli O157:H7* and 7 mL of the treated or untreated *E. coli O157:H7* cultures were inoculated into a 20 mL glass vial sealed with PTFE cap. The incubation condition was set as 37 °C with agitation at 150 r/min for overnight. For each sampling procedure, the probe was inserted into the glass vial for 20 mm to conduct headspace extraction. Other extraction conditions of in vivo volatile metabolites were set as follows: balance temperature, 37 °C; balance time, 60 min; extraction temperature, 37 °C; extraction time, 60 min; desorption temperature, 250 °C; desorption time, 5 min.

**GC-QTOFMS analysis and data processing.** GC-QTOFMS analysis was performed using an Agilent 7890B GC instrument (Agilent Technologies, Shang Hai, China) with a 7250 accurate-mass QTOFMS instrument (mass resolution 20,000 and a mass accuracy specification of 3 ppm) (Agilent Technologies, Shang Hai, China). In our work, a HP-5 MS column (30 m long, 250 µm i.d., with a 0.25-µm-thick 5% phenyl-95% dimethylpolysiloxane film; Agilent Technologies) was used as the 1D column. The samples were introduced by a split/splitless injector (SSL) system with an autosampler (PAL RSI 120, CTC Technologies). The MS parameters were set as follows: electron impact ionization, 70 eV; transfer line temperature, 280 °C; ion source temperature, 200 °C and MS quadrupole temperature, 150 °C.

The MS system was routinely set in a scan mode. The carrier gas was helium, and the constant flow rate was 1 mL/min. For analysis of volatile metabolites generated from *E. coli O157:H7*, the oven temperature program started at 50 °C (held for 1 min), and then increased at 5 °C/min to 260 °C (held for 2 min). The total analysis time was 45 min.

In vivo volatile metabolites generated by *E. coli O157:H7* were identified according to our previous work [3]. Briefly, the detected metabolites were identified based on (1) spectral similarity of the data available in the National Institute of Standards and Technology (NIST) library (match factor threshold >70), (2) comparison with accurate mass of molecular ions (within 40 ppm), if they existed, and (3) retention index (RI, within 20 units). RI was calculated by a series of n-alkanes (C<sub>9</sub> - C<sub>25</sub>) analyzed on a HP-5 MS column under the same chromatographic conditions. Semi-quantitative information for the volume fractions of the identified compounds (mean of five replicate trials) were obtained using peak area normalization, which was shown as below: on the assumption of equal response factor, the sum of the peak areas of all the compounds was treated as 1, and then the percentage of the peak area of each component to the total peak area was calculated as component content.

## **Text S2**

**RNA extraction.** RNA extraction was performed by using bacteria total RNA isolation kit (Sangon Biotech (Shanghai) Co., Ltd., China) following the instructions. After overnight cultivation in response to 0.05- $\mu$ m, 0.2- $\mu$ m and 0.6- $\mu$ m PS microbeads with a certain concentration of 1 mg/mL, *E. coli O157:H7* suspension (1mL) within the logarithmic phase was harvested and centrifuged at 8000 rpm for 1 min at 4 °C. After discarding the supernatant, *E. coli O157:H7* cells were washed three times with sterile deionized water, followed by 100

$\mu\text{L}$  lysis solution (400  $\mu\text{g}/\text{ml}$ ) addition for 3-5 min. Later, 900  $\mu\text{L}$  Buffer Rlysis-B was added into the above solution system with an intensive mixing, and the whole solution was in incubation for 3 min at room temperature. Then, 200  $\mu\text{L}$  chloroform was fully mixed into the material and the suspension was centrifuged again at 12,000 rpm for 5 min at 4°C, sampling the supernatant. Anhydrous ethanol (1/3 of the supernatant volume) was subsequently added and the mixture was placed at room temperature for 3 min, followed by a new centrifugation at 12,000 rpm for 5 min at 4 °C and all sediments acquisition, which would be washed by 75% ethanol prepared in DEPC-treated ddH<sub>2</sub>O (700  $\mu\text{L}$ ) twice. Finally, the sediments were inverted at room temperature for 10 min to get rid of the remaining ethanol, dissolved by DEPC-treated ddH<sub>2</sub>O (30-50  $\mu\text{L}$ ), and stored at -70°C for a long time. The RNA samples were treated with RQ1 DNase (Ambion AM 1906), following the manufacturer's instructions. RNA purity and concentration were measured using the Nanodrop ND-1000.

**Reverse transcriptase (RT).** RT reactions were conducted by PrimeScript™II 1st Strand cDNA Synthesis Kit (Takara, Japan), using 5  $\mu\text{g}$  of total RNA, 1  $\mu\text{L}$  Oligo dT Primer (50  $\mu\text{M}$ ) and 1  $\mu\text{L}$  dNTP Mixture (10 mM each). Prior to cDNA synthesis, denaturation was performed for 5 min at 65 °C and then rapidly placed on ice for cooling. After this step, 10  $\mu\text{L}$  of denatured reaction liquid above, 4  $\mu\text{L}$  of 5× PrimeScript II Buffer, 20 U of RNase Inhibitor (40 U/ $\mu\text{L}$ ) and 200 U of PrimeScript II RTase (200 U/ $\mu\text{L}$ ) were added to each reaction to a final volume of 20  $\mu\text{L}$  by RNase Free ddH<sub>2</sub>O. The reaction conditions were 10 min at 30 °C, 30-60 min at 42 °C and 5 min at 95 °C.

**Relative quantification of gene expression using RT-PCR.** After obtaining the cDNA, real-time quantitative reverse transcription polymerase chain reaction (RT-PCR) was

performed using the 7500 Real-Time PCR System. The reactions were performed in a final volume of 20  $\mu\text{L}$ , containing 0.8  $\mu\text{L}$  of each primer, 0.4  $\mu\text{L}$  of 50 $\times$  ROX Reference Dye, 2  $\mu\text{L}$  of cDNA synthesis, 10  $\mu\text{L}$  of 2 $\times$  TB Green<sup>®</sup> Premix Ex Taq<sup>™</sup> II (Tli RNaseH Plus) and a small amount of sterile water. The reaction procedure was as following: the divided stage one was for pre-degeneration at 95  $^{\circ}\text{C}$  for 30 s, and then stage two was for PCR reaction at 95  $^{\circ}\text{C}$  for 5 s firstly and at 60  $^{\circ}\text{C}$  for 30-34 s. Each treatment was tested with 4–6 biological replicates with each biological replicate consisting of three technical replicates each. The primers used for RT-PCR analysis referred to previous studies [4-5] and were listed in supplementary table S1.

## Supplementary Tables

**Table S1.** TaqMan® primers and probes.

| Primers and probes   | Primers sequences (5' to 3') |
|----------------------|------------------------------|
| 16srRNA-Forward      | CAGCCACACTGGAAGTGGAGA        |
| 16srRNA-Reverse      | GTTAGCCGGTGCTTCTTCTG         |
| <i>tolC</i> -Forward | CTGAAAGAAGCCGAAAAACG         |
| <i>tolC</i> -Reverse | CTGGCCCATATTGCTATCGT         |
| <i>acrA</i> -Forward | AGCCCTAACAGGATGTGACG         |
| <i>acrA</i> -Reverse | GCTTCGATGTCGCTACCTTC         |
| <i>acrB</i> -Forward | GATTACCATGCGTGCAACAC         |
| <i>acrB</i> -Reverse | TCTGCAAGCAACTGGTTACG         |
| <i>oxyR</i> -Forward | CATTCATTGAAGTGCCGTTG         |
| <i>oxyR</i> -Reverse | CGCGGAAGTGTGTATCTTCA         |
| <i>soxR</i> -Forward | GTATCCGTAACAGCGGCAAT         |
| <i>soxR</i> -Reverse | CATTGGGACGAAAGCTGTTT         |
| <i>soxS</i> -Forward | TTATCGCATGGATTGACGAG         |
| <i>soxS</i> -Reverse | ACATAACCCAGGTCCATTGC         |

**Table S2.** In vivo volatile metabolites acquired from the untreated and PS-treated *E. coli* O157:H7.

| Number | Compound                                            | RT      | Match factors | CAS          | RI <sub>exp</sub> | RI <sub>lib</sub> | M <sub>cal</sub> (amu) | M <sub>exp</sub> (amu) |
|--------|-----------------------------------------------------|---------|---------------|--------------|-------------------|-------------------|------------------------|------------------------|
| 1      | disulfide, dimethyl                                 | 7.212   | 90.8          | 624-92-0     | 763               | 746±6             | 93.9911                | 93.9906                |
| 2      | dimethyl trisulfide                                 | 14.3606 | 99.3          | 3658-80-8    | 984               | 970±7             | 125.9632               | 125.9626               |
| 3      | 2-nonanone                                          | 17.8958 | 94.6          | 821-55-6     | 1094              | 1092±2            | 142.1358               | 142.1353               |
| 4      | benzyl nitrile                                      | 19.5804 | 89            | 140-29-4     | 1149              | 1144±5            | 117.0578               | 117.0575               |
| 5      | 3-decanone                                          | 20.8193 | 73.6          | 928-80-3     | 1190              | 1187±3            | 156.1514               | 156.1499               |
| 6      | 2-decanone                                          | 20.9656 | 80.1          | 693-54-9     | 1195              | 1193±2            | 156.1514               | 156.1505               |
| 7      | octylcyclopropane                                   | 23.2345 | 87.7          | 1472-09-9    | 1273              | 1095±20           | 154.1722               | --                     |
| 8      | 2-undecanone                                        | 23.9177 | 93            | 112-12-9     | 1297              | 1294±2            | 170.1671               | 170.1668               |
| 9      | 2-undecanol                                         | 24.0495 | 89.2          | 1653-30-1    | 1302              | 1307±4            | 172.1827               | --                     |
| 10     | indole                                              | 24.3083 | 99            | 120-72-9     | 1311              | 1295±7            | 117.0578               | 117.0575               |
| 11     | 2-dodecanone                                        | 26.6498 | 87.6          | 6175-49-1    | 1398              | 1396±9            | 184.1827               | 184.1825               |
| 12     | cyclodecanol                                        | 27.043  | 94            | 1502-05-2    | 1413              | --                | 156.1514               | 156.1548               |
| 13     | cubenene                                            | 27.9174 | 75.2          | 29837-12-5   | 1447              | 1532±1            | 204.1878               | 204.1884               |
| 14     | cis-thujopsene                                      | 28.399  | 83.8          | 470-40-6     | 1466              | 1433±8            | 204.1878               | 204.1886               |
| 15     | 9-Decen-1-ol, methyl ether                          | 28.9931 | 84.9          | 1000352-65-1 | 1489              | --                | 170.1671               | --                     |
| 16     | 2-tridecanone                                       | 29.2396 | 94.9          | 593-08-8     | 1499              | 1497±4            | 198.1984               | 198.1982               |
| 17     | 2-tridecanol                                        | 29.3587 | 90            | 1653-31-2    | 1504              | 1510±0            | 200.2140               | 200.2091               |
| 18     | 2,4-di-tert-butylphenol                             | 29.7134 | 91            | 96-76-4      | 1519              | 1519±6            | 206.1671               | 206.1668               |
| 19     | (R)-1-methyl-4-(1,2,2-trimethylcyclopentyl)-benzene | 30.2027 | 85.1          | 16982-00-6   | 1539              | 1505±4            | 202.1722               | 202.1727               |
| 20     | 1,1,4,5,6-pentamethyl-2,3-dihydro-1h-indene         | 30.4602 | 87            | 16204-67-4   | 1549              | 1523±N/A          | 188.1565               | 188.1559               |
| 21     | 1-methyl-7-(1-methylethyl)-naphthalene              | 31.4786 | 78.2          | 490-65-3     | 1592              | 1603±25           | 184.1252               | 184.1252               |

| Number | Compound                                                | RT   | Match factors | CAS          | RI <sub>exp</sub> | RI <sub>lib</sub> | M <sub>cal</sub> (amu) | M <sub>exp</sub> (amu) |
|--------|---------------------------------------------------------|------|---------------|--------------|-------------------|-------------------|------------------------|------------------------|
| 22     | hexadecane                                              | 87.1 | 87.1          | 544-76-3     | 1601              | 1600              | 226.2661               | 226.2661               |
| 23     | 2,4,6-tri-tert-butyl-phenol                             | 89.8 | 89.8          | 732-26-3     | 1619              | 1627±N/A          | 262.2297               | 262.2293               |
| 24     | cedrol                                                  | 78.4 | 78.4          | 77-53-2      | 1647              | 1598±3            | 222.1984               | 222.1950               |
| 25     | 3-methyl-hexadecane                                     | 90.6 | 90.6          | 6418-43-5    | 1673              | 1671±5            | 240.2817               | --                     |
| 26     | 2-pentadecanone                                         | 88.3 | 88.3          | 2345-28-0    | 1703              | 1698±4            | 226.2297               | 226.2292               |
| 27     | methyl myristoleate                                     | 80.2 | 80.2          | 56219-06-8   | 1707              | 1715±0            | 240.2089               | 240.2095               |
| 28     | methyl tetradecanoate                                   | 90.6 | 90.6          | 124-10-7     | 1726              | 1725±2            | 242.2246               | 242.2248               |
| 29     | 4-methyl-heptadecane                                    | 90.7 | 90.7          | 26429-11-8   | 1759              | 1758±1            | 254.2974               | --                     |
| 30     | octadecane                                              | 89.6 | 89.6          | 593-45-3     | 1800              | 1800              | 254.2974               | 254.2990               |
| 31     | Pentadecanoic acid, methyl ester                        | 74.1 | 74.1          | 7132-64-1    | 1826              | 1820±4            | 256.2402               | 256.2395               |
| 32     | 1,4-diphenyl-1,3-butadiene                              | 89.8 | 89.8          | 886-65-7     | 1835              | 1738±N/A          | 206.1096               | 206.1095               |
| 33     | 1,2-Benzenedicarboxylic acid, bis(2-methylpropyl) ester | 88.3 | 88.3          | 84-69-5      | 1884              | 1870±4            | 278.1518               | --                     |
| 34     | nonadecane                                              | 94.9 | 94.9          | 629-92-5     | 1900              | 1900              | 268.3130               | 268.3170               |
| 35     | 1-(phenylmethylene)-1h-indene                           | 89.9 | 89.9          | 5394-86-5    | 1904              | --                | 204.0939               | 204.0932               |
| 36     | hexadecanoic acid, methyl ester                         | 81.5 | 81.5          | 112-39-0     | 1927              | 1926±2            | 270.2559               | 270.2565               |
| 37     | eicosane                                                | 95.3 | 95.3          | 112-95-8     | 2000              | 2000              | 282.3287               | 282.3264               |
| 38     | 3,4-dihydro-4-phenyl-1(2h)-naphthalenone                | 80   | 80            | 1000337-94-1 | 2044              | --                | 222.1045               | 222.1036               |
| 39     | docosane                                                | 92.3 | 92.3          | 629-97-0     | 2200              | 2200              | 310.3600               | 310.3578               |
| 40     | tricosane                                               | 81   | 81            | 638-67-5     | 2300              | 2300              | 324.3756               | 324.3775               |

RT, retention time;

RI<sub>exp</sub>, a series of alkanes (C<sub>9</sub> - C<sub>25</sub>) was used to calculate the retention index; RI<sub>lib</sub>, the retention index in the NIST library;

M<sub>cal</sub>, accurate molecular mass of theory; M<sub>exp</sub>, accurate molecular mass of the actual measurement.



## Supplementary Figures

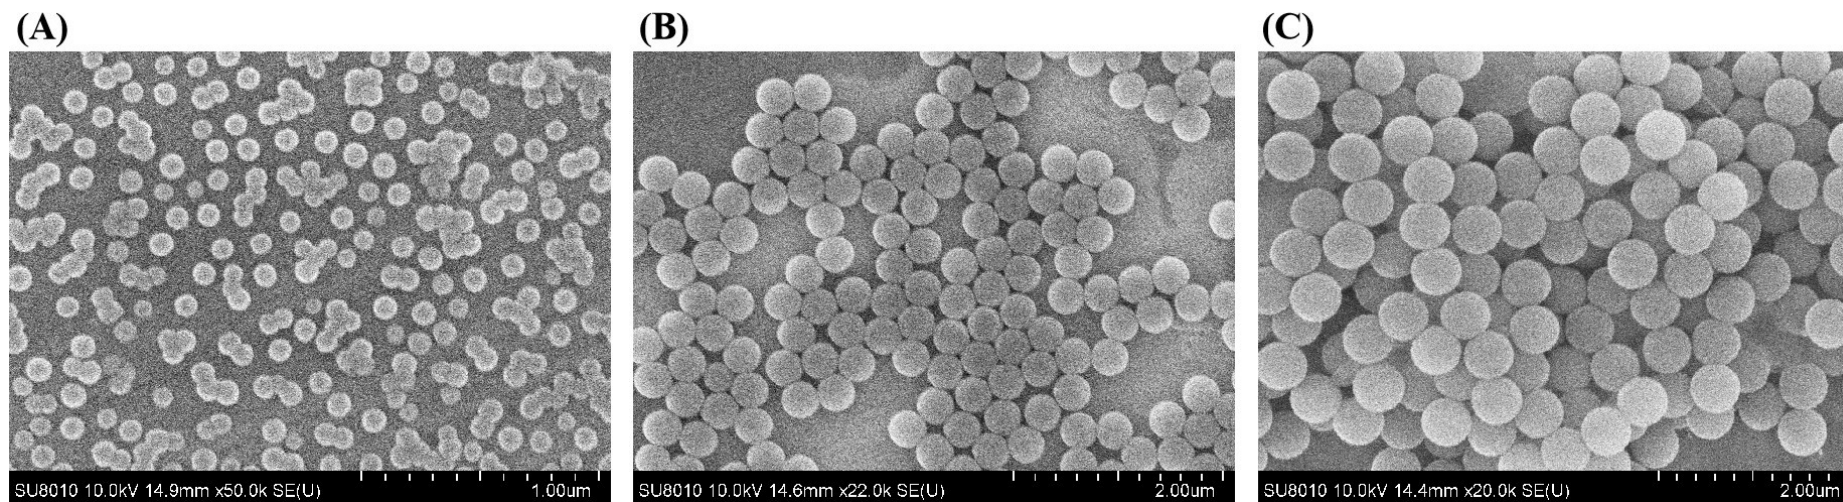

**Fig. S1.** Polystyrene nanoplastics (PS-NPs) used in this study (A, 0.05-0.1 μm PS-NPs; B, 0.2-0.5 μm PS-NPs; C, 0.6-0.9 μm PS-NPs).

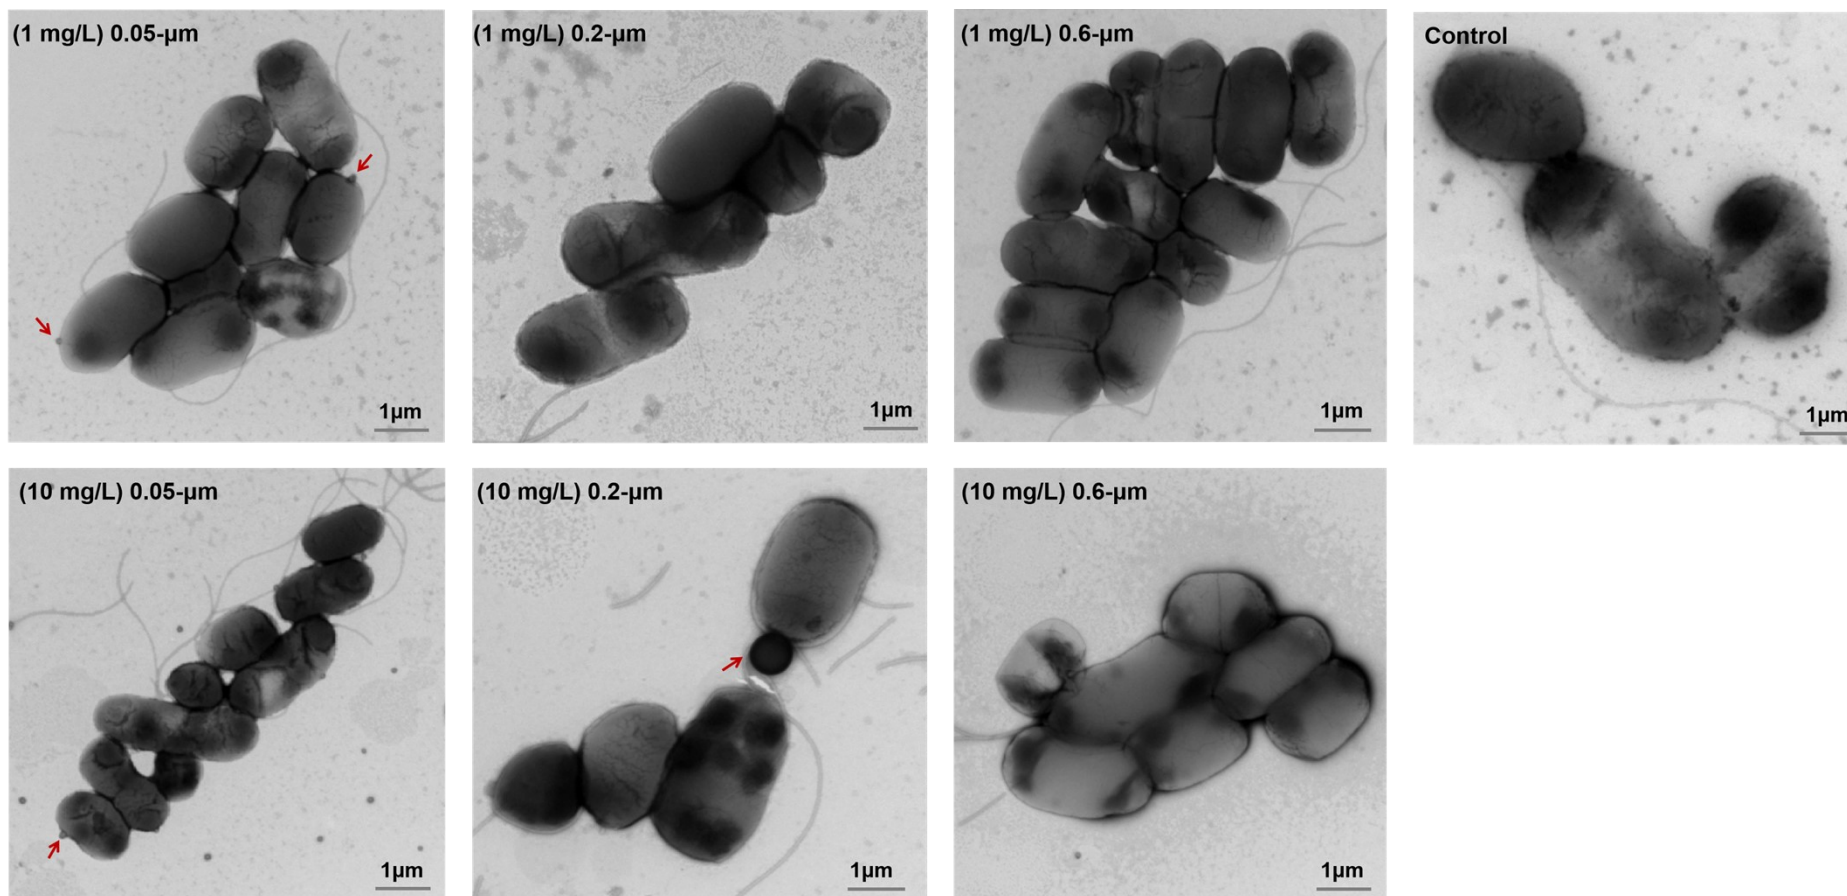

**Fig. S2.** *E. coli* O157:H7 morphologies after PS-NPs exposures in three sizes at the concentration of 1 mg/mL and 10 mg/mL.

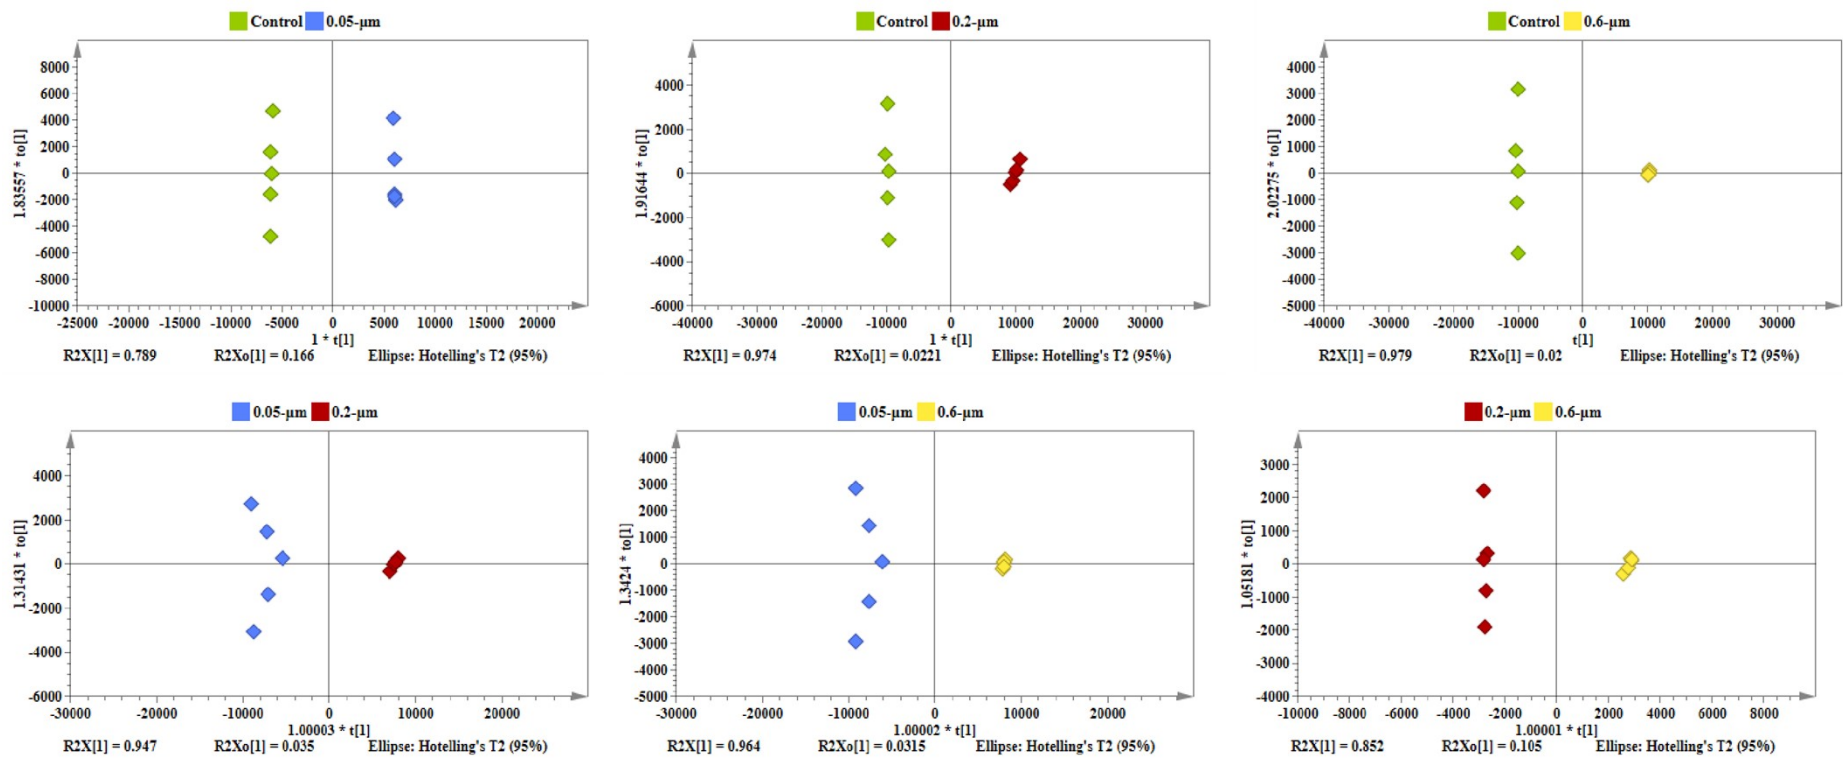

Fig. S3. OPLS-DA plots of in vivo volatile metabolites in pairwise comparison

## Supplementary References

- [1] Liu S, Fang S, Huang Y, Xiang Z, Ouyang G (2020). A heterogeneous pore decoration strategy on a hydrophobic microporous polymer for high-coverage capture of metabolites. *Chemical Communications*, 56, 7167-7170.
- [2] Huang Y, Fang S, Xiang Z, Liu S, Ouyang G (2022). In vivo environmental metabolomic profiling via a novel microextraction fiber unravels sublethal effects of environmental norfloxacin in gut bacteria. *Science of the Total Environment*, 845, 157335.
- [3] Fang S, Liu S, Song J, Huang Q, Xiang Z (2021). Recognition of pathogens in food matrixes based on the untargeted in vivo microbial metabolite profiling via a novel SPME/GC×GC-QTOFMS approach. *Food Research International*, 142, 110213.
- [4] Fu L, Wei Z, Hu K, Hu L, Li Y, Chen X, Han Z, Yao G, Zhang H (2018). Hydrogen sulfide inhibits the growth of *Escherichia coli* through oxidative damage. *Journal of Microbiology*, 56, 238–245.
- [5] Telke A, Olaitan A, Morand S, Rolain J (2017). SoxRS induces colistin hetero-resistance in *Enterobacter asburiae* and *Enterobacter cloacae* by regulating the *acrAB-tolC* efflux pump. *Journal of Antimicrobial Chemotherapy*, 72(10), 2715-2721.
